# Supplementary material for: The impact of RNA binding motif protein 4-regulated splicing cascade on the progression and metabolism of colorectal cancer cells
Source: PubMed Central journal article supplement (PMC4741983; doi:10.18632/oncotarget.5710), 2015-10-19
Supplement: oncotarget-06-38046-s001.pdf [file oncotarget-06-38046-s001.pdf]

## SUPPLEMENTARY TABLES AND FIGURE

Supplementary Table S1: Putative targeting miRNAs of RBM4

| miRNA          | Alignment                                                                           | Leftmost position of predicted site | Folding energy (Kcal/mol) | p Value |
|----------------|-------------------------------------------------------------------------------------|-------------------------------------|---------------------------|---------|
| has-miR-103a   | CAGGAGCTGCTGCCACAGCTGCTGCT<br>   :        :      <br>AGTATCGG-GAC-ATGTT-ACGACGA     | +837                                | -14.0                     | 5.61E-3 |
| hsa-miR-18a    | CCAGAATACAGC-C-ATGGCCAGT<br>                   <br>GGTCTT-CCTCGTGAATCCCGTCA         | +763                                | -15.2                     | 2.56E-2 |
| hsa-miR-92a    | ACATGGAGCGGGCAGAGGATGCAGTG<br>               :     : <br>TGT-CC-GGCCC-TGTTT-ACGTTAT | +348                                | -19.2                     | 5.23E-2 |
| hsa-miR-23a    | GGAAGGTGCTGG-AATGTGAC<br>   : :          <br>CCTTTAGGGACCGTTACTACTA                 | +75                                 | -18.8                     | 3.21E-1 |
| hsa-miR-139    | GCGCTA-CAGCCCC-AGTCCCCA<br>:   :             <br>TGAGGTTGTCCCGGCGCAGAGGT            | +936                                | -14.6                     | 2.3E-2  |
| hsa-miR-222    | TAGA-AGACAAGACGGCAGCTGAG<br>           :   <br>TCCTAGATGT--GACCGATGACTC             | +123                                | -14.2                     | 9.43E-2 |
| hsa-miR-324-5p | ACAAGACGGCAGCTG-AGGATGCC<br>         :      <br>TGTGGTTACG-GGATCCCCTACGC            | +129                                | -14.2                     | 9.43E-2 |
| hsa-miR-214    | GATGCCTACTACAAGCGCTGCCGT<br>                <br>TGACGGA-CAGACACG-GACGACA            | +653                                | -14.2                     | 3.47E-1 |
| hsa-miR-25     | ATGGAGCGGGCAGAGGATGCAGTG<br>:     :     :     : <br>AGTCTGGCTC-TGTTT-ACGTTAC        | +350                                | -18.7                     | 5.23E-2 |
| hsa-miR-24     | TCCCCACTGTTGGAGAGGGCTA<br>   :  :   : :<br>GACAAGGACGACTTGACTCGGT                   | +951                                | -16.4                     | 2.3E-2  |
| hsa-miR-17     | CCGCTGCTGCTGTTACTGCAGC<br>    :  :     <br>GATGTTACGGAAGTGACGTCA                    | +873                                | -17.6                     | 2.92E-2 |
| hsa-miR-17     | CTGCCTCCTGCCT-C-CTGCGGC<br>  :             : <br>GATG-TTCACGGAAGTGACGTCA            | +1346 (3'UTR)                       | -24.1                     | 4.85E-3 |

**Supplementary Table S2: List of upregulated miRNAs in CRC tissues**

| Candidates        | Reference                                  |
|-------------------|--------------------------------------------|
| <i>miR-92a</i>    | Int J Colorectal Dis, 28, 19–24            |
| miR-21            | Eur J Cancer, 51, 409–420                  |
| miR-29a           | Cancer Biomark, 15, 103–113                |
| miR-125           | Eur J Cancer, 51, 409–420                  |
| miR-196           | World J Gastroenterol, 18, 2827–2831.      |
| <i>miR-103</i>    | Int J Mol Sci. 2014 May 13;15(5):8458–8472 |
| miR-135b          | Am J Cancer Res, 5, 1382–1395              |
| miR-26b           | J Cell Mol Med, 15, 1941–1954              |
| miR-182           | Oncol Rep, 33, 2592–2598                   |
| miR-206           | Oncol Rep, 33, 1402–1410                   |
| lmiR-7            | Carcinogenesis, 36, 338–345                |
| miR-320b          | Eur J Cancer, 51, 409–420                  |
| miR-193a          | World J Gastroenterol, 20, 12241–12248     |
| miR-708           | Oncol Lett, 8, 1768–1774.                  |
| miR-31            | Oncol Lett, 8, 1768–1774.                  |
| <i>miR-18a</i>    | Cancer Biomark, 15, 103–113                |
| miR-155           | Tumour Biol, 36, 1619–1625                 |
| miR-181a          | J Clin Pathol, 67, 198–203                 |
| amiR-106a         | FEBS Lett, 588, 705–712.                   |
| miR-15a-3p        | PLoS One, 10, e0132495                     |
| miR-19            | Mol Cancer Res, pii: molcanres.0466.2014.  |
| <i>miR-23a</i>    | Int J Mol Sci, 15, 11713–11729.            |
| miR-224           | Br J Cancer, 112, 1480–1490                |
| miR-200b          | RNA Biol, 12, 276–289                      |
| miR-200c          | RNA Biol, 12, 276–289                      |
| miR-124           | Biochim Biophys Acta., pii: S0925–4439     |
| miR-30            | Mol Cell Biol, 35, 988–1000                |
| <i>miR-214</i>    | Hum Mutat, 33, 551–560                     |
| miR-455-3p        | PLoS One, 9, e109430                       |
| <i>miR-17</i>     | Oncotarget, 5, 2974–2987                   |
| miR-128           | Oncotarget, 6, 5412–5425                   |
| lmiR-130b         | Neoplasia, 15, 1218–1231                   |
| bmiR-152          | Mol Cell Biochem, 345, 283–290             |
| miR-34b           | Med Oncol, 31, 894                         |
| <i>miR-25</i>     | Int J Mol Med, 34, 1286–1292               |
| miR-20b           | Hum Immunol, 75, 348–353                   |
| <i>miR-24</i>     | Eur J Cancer, 51, 409–420                  |
| miR-18b           | Cancer Res, 70, 8233–8246                  |
| miR-93-5p         | PLoS One, 8, e83025                        |
| <i>miR-324-5p</i> | Unknown                                    |
| <i>miR-139-3p</i> | Oncol Rep, 25, 739–747                     |
| <i>miR-222-5p</i> | Exp Cell Res, 318, 2168–2177               |

**Supplementary Table S3: List of PCR Primers**

| Gene                      | Forward                           | Reverse                          | cycle |
|---------------------------|-----------------------------------|----------------------------------|-------|
| <i>nPTB</i>               | gcatttgccaaggagacatcc             | cgctgcacatctccataaacac           | 35    |
| <i>nPTB(minigene)</i>     | atcggtagcggcttctgtgcagctgttc      | atcgatatccaagttgtgattggttcc      | 30    |
| <i>nPTB(minigene mut)</i> | aaagtctgtttaccggcttcggtatgtattg   | caataacataccgaagccgtaaacagacttt  | 18    |
| <i>hRBM4 (ORF)</i>        | atctctagatggctccggtcatcgaatgtg    | atcgcgccgcgcgctcctgtacgcgttgtg   | 30    |
| <i>hRBM4 (ORF mut)</i>    | cgggcagaggatgcaggggaggccatcaggggc | gccctgatggcctcccctgcatcctctgcccg | 18    |
| <i>miR-92a-2</i>          | tattgcaactgtccggcctgt             |                                  |       |
| <i>miR-92a-2 (WT)</i>     | gtgaattctgtgtgatattctgctg         | ggctcgagtgcctcaaatctgacacgc      | 35    |
| <i>miR-92a-2 (m5P)</i>    | accctttctacacatgttgggatcgggtgc    | gcaaccgatccaacatgtgtagaagggt     | 10    |
| <i>miR-92a-2 (m3P)</i>    | gtgttctgtatgtctgcacttgcctccgg     | ccgggacaagtgaagaccatacagaaacac   | 18    |
| <i>SV40miR-polyA(R)</i>   | tttggaggcctaggctttt               | ccgaggcggccgacatgttt             | 35    |
| <i>FGFR2</i>              | ggatcaagcacgtggaaaagaac           | ggcgattaagaagaccctatgc           | 35    |
| <i>PKM1/2</i>             | agaaacagccaaaggggact              | cattcatggcaaagttcacc             | 35    |
| <i>GAPDH</i>              | cggagtcaacggatttggctgatg          | agccttctccatggtggtgaagac         | 30    |
| <i>RBM4</i>               | taggatccgcagtgcgtac               | ttaaaaggctgagtcgcg               | 35    |
| <i>16S rRNA</i>           | agagtttgatcmtggctcag              | ggmtacctgttacgactt               |       |
| <i>Pri-miR-92a-1</i>      | ctttctacacaggtg                   | caaaactcaacaggc                  |       |
| <i>Pri-miR-92a-2</i>      | tctccagcactcatgcc                 | ctttctccacagggcg                 |       |

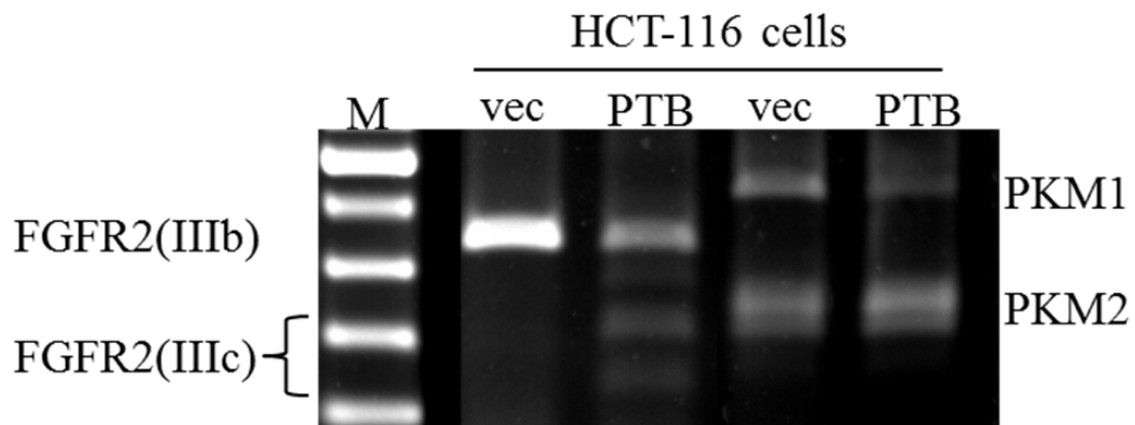

**Supplementary Figure S1: Polypyrimidine tract-binding protein (PTB) modulated the splicing patterns of the *FGFR2* and *PKM* genes** HCT-116 cells were transfected with empty vector or PTB expressing vector, followed by total RNA extraction. Splicing profiles of *FGFR2* and *PKM* pre-mRNAs were analyzed as described in “Materials and methods” section.
